# Supplementary material for: Seasonal and Year-Round Distributions of Bactrocera dorsalis (Hendel) and Its Risk to Temperate Fruits under Climate Change
Source: Insects. 2022 Jun 16;13(6):550. doi: 10.3390/insects13060550 (PMC9225012; doi:10.3390/insects13060550)
Supplement: Supplementary file 1 [file insects-13-00550-s001.zip › insects-1632977-supplementary.pdf]

## Supplementary Materials

# Seasonal and Year-Round Distributions of *Bactrocera dorsalis* (Hendel) and Its Risk to Temperate Fruits under Climate Change

Zhaoke Dong <sup>1</sup>, Yitong He <sup>1,2</sup>, Yonglin Ren <sup>2</sup>, Guanjin Wang <sup>3</sup> and Dong Chu <sup>1,\*</sup>

- <sup>1</sup> Engineering Research Center for Precision Pest Management for Fruits and Vegetables of Qingdao, Key Lab of Integrated Crop Pest Management of Shandong Province, College of Plant Health and Medicine, Qingdao Agricultural University, Qingdao 266109, China; zhaoke\_dong@126.com (Z.D.); hoyt.he@murdoch.edu.au (Y.H.)
- <sup>2</sup> College of Science, Health, Engineering and Education, Murdoch University, 90 South St., Murdoch, WA 6150, Australia; y.ren@murdoch.edu.au
- <sup>3</sup> Discipline of Information Technology, Murdoch University, Perth, WA 6150, Australia; guanjin.wang@murdoch.edu.au
- \* Correspondence: chinachudong@qau.edu.cn (D.C.)

**Citation:** Dong, Z.; He, Y.; Ren, Y.; Wang, G.; Chu, D. Seasonal and Year-Round Distributions of *Bactrocera dorsalis* (Hendel) and Its Risk to Temperate Fruits under Climate Change. *Insects* **2022**, *13*, 550. <https://doi.org/10.3390/insects13060550>

Academic Editor: Grzegorz A. Buczkowski

Received: 31 March 2022

Accepted: 14 June 2022

Published: 16 June 2022

**Publisher's Note:** MDPI stays neutral with regard to jurisdictional claims in published maps and institutional affiliations.

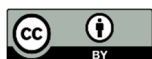

**Copyright:** © 2022 by the authors. Licensee MDPI, Basel, Switzerland. This article is an open access article distributed under the terms and conditions of the Creative Commons Attribution (CC BY) license (<http://creativecommons.org/licenses/by/4.0/>).

**Table S1.** The 19 bioclimatic variables and their descriptions, see <https://www.world-clim.org/data/bioclim.html> for details.

| Variables | Descriptions                                                                     | Unit                     |
|-----------|----------------------------------------------------------------------------------|--------------------------|
| Bio1      | Annual Mean Temperature                                                          | °C                       |
| Bio2      | Mean Diurnal Range                                                               | °C                       |
| Bio3      | Isothermality. Mean diurnal temperature range /<br>annual temperature range *100 | -                        |
| Bio4      | Temperature Seasonality                                                          | coefficient of variation |
| Bio5      | Max Temperature of Warmest Month                                                 | °C                       |
| Bio6      | Min Temperature of Coldest Month                                                 | °C                       |
| Bio7      | Temperature Annual Range                                                         | °C                       |
| Bio8      | Mean Temperature of Wettest Quarter                                              | °C                       |
| Bio9      | Mean Temperature of Driest Quarter                                               | °C                       |
| Bio10     | Mean Temperature of Warmest Quarter                                              | °C                       |
| Bio11     | Mean Temperature of Coldest Quarter                                              | °C                       |
| Bio12     | Annual Precipitation                                                             | mm                       |
| Bio13     | Precipitation of Wettest Month                                                   | mm                       |
| Bio14     | Precipitation of Driest Month                                                    | mm                       |
| Bio15     | Precipitation Seasonality                                                        | coefficient of variation |
| Bio16     | Precipitation of Wettest Quarter                                                 | mm                       |
| Bio17     | Precipitation of Driest Quarter                                                  | mm                       |
| Bio18     | Precipitation of Warmest Quarter                                                 | mm                       |
| Bio19     | Precipitation of Coldest Quarter                                                 | mm                       |

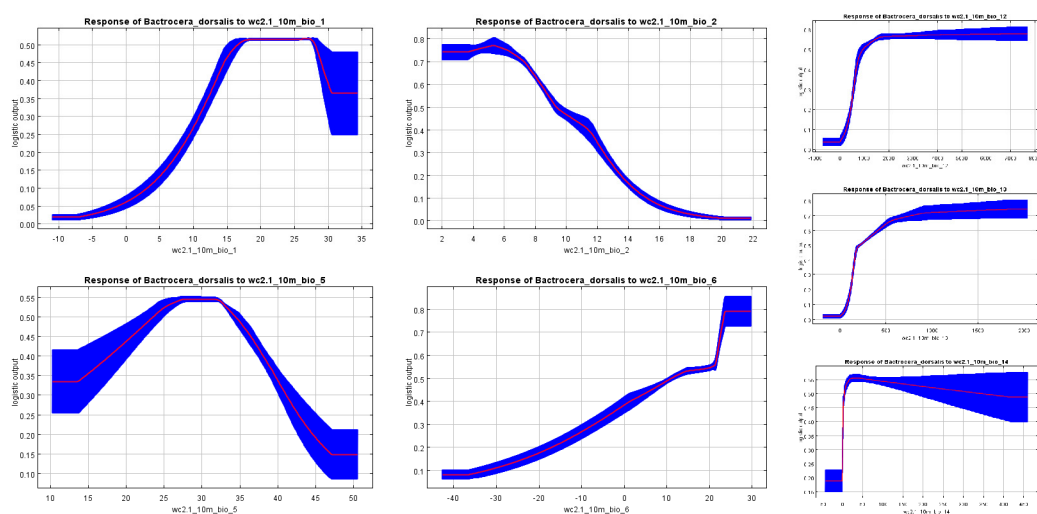

**Figure S1.** Response curves showing the relationship of MaxEnt predicted probability of seasonal occurrence of *Bactrocera dorsalis* to environmental variables. The values shown on the y-axis are the predicted probability of suitable conditions. The values on the x-axis refer to the corresponding bioclimate variable. Each curve is made by generating a MaxEnt model using only the corresponding predictor variable, disregarding all other variables.

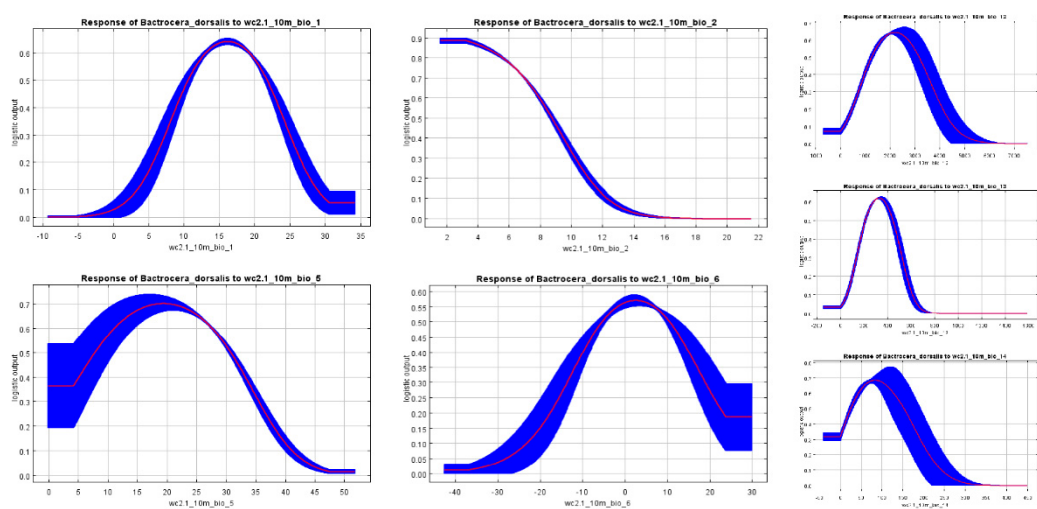

**Figure S2.** Response curves showing the relationship of MaxEnt predicted probability of year-round occurrence of *Bactrocera dorsalis* to environmental variables. The values shown on the y-axis are the predicted probability of suitable conditions. The values on the x-axis refer to the corresponding bioclimate variable. Each curve is made by generating a MaxEnt model using only the corresponding predictor variable, disregarding all other variables.

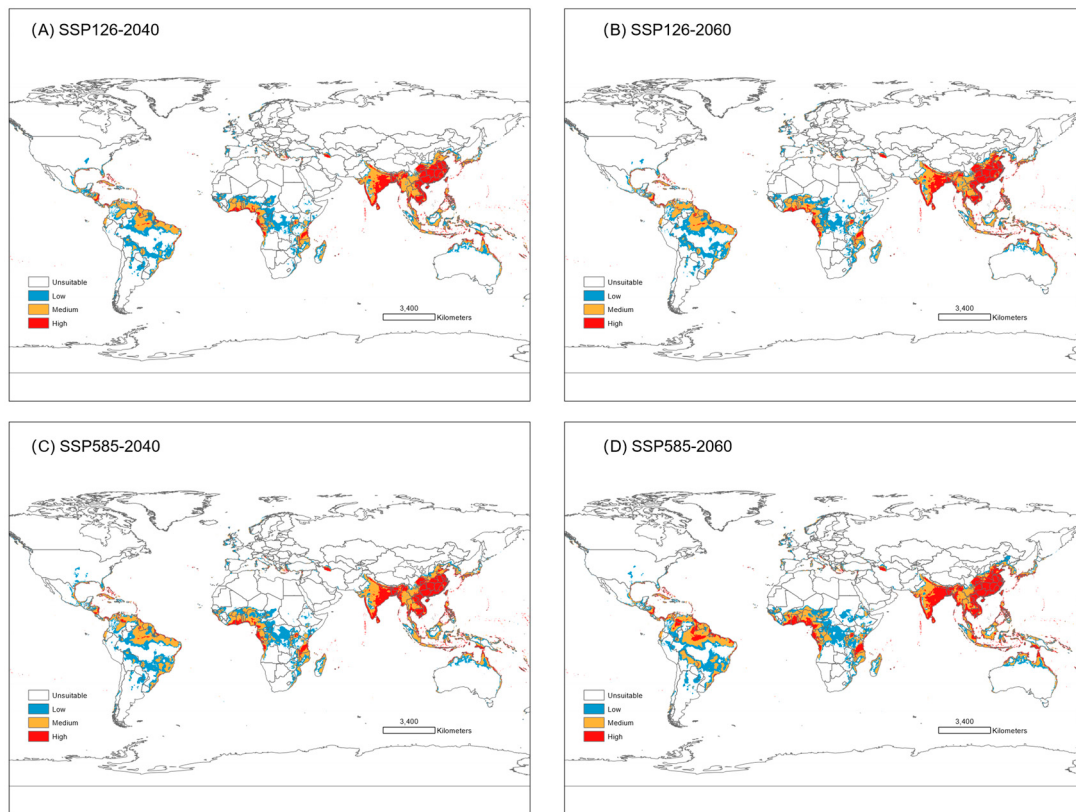

**Figure S3.** Predicted seasonal distribution of *B. dorsalis* under two climate scenarios (SSP126 and SSP585) and two future years (2040 and 2060). White, unsuitable habitat area; blue, low suitability area; orange, medium suitability; red, high suitability. (A) SSP126 to 2040, (B) SSP126 to 2060, (C) SSP585 to 2040 and (D) SSP585 to 2060.

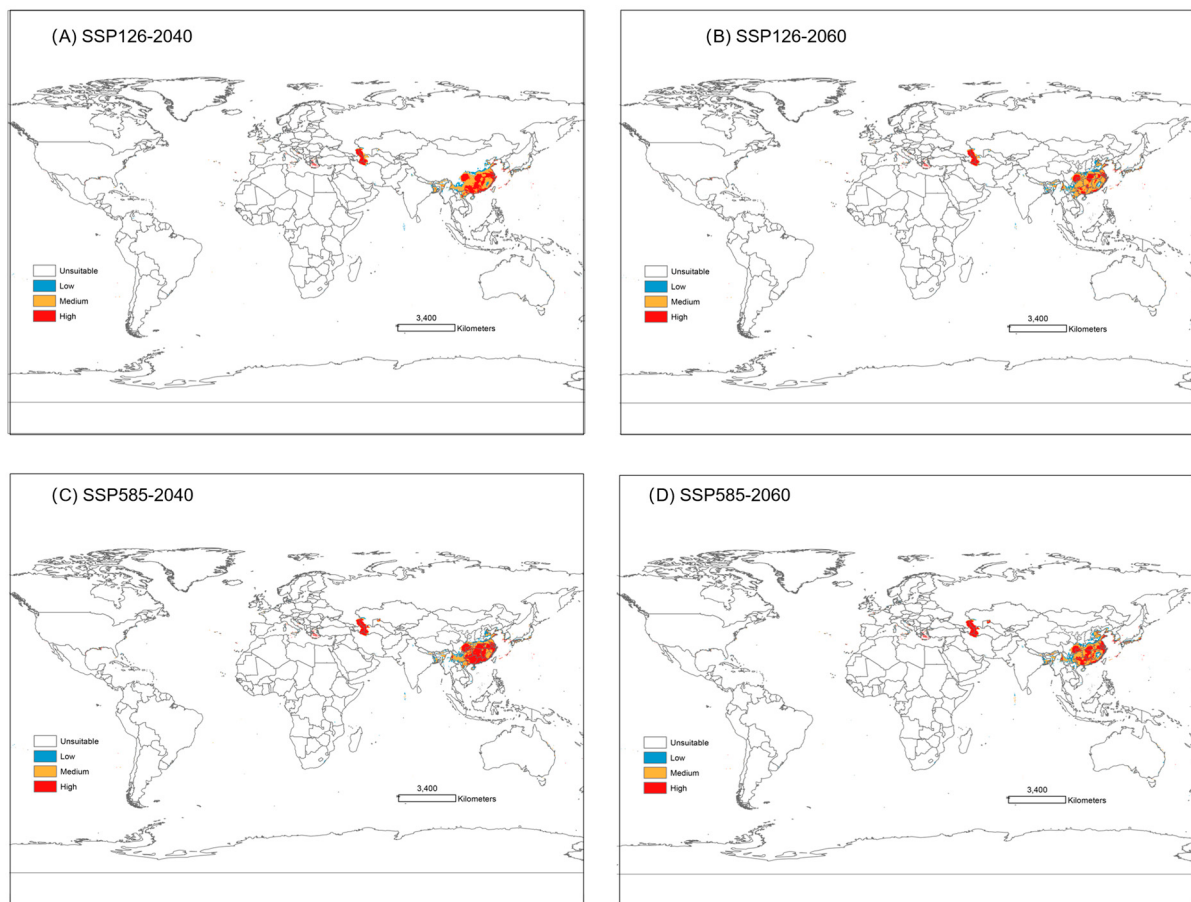

**Figure S4.** Predicted year-round distribution of *B. dorsalis* under two climate scenarios (SSP126 and SSP585) and two future years (2040 and 2060). White, unsuitable habitat area; blue, low suitability area; orange, medium suitability; red, high suitability. (A) SSP126 to 2040, (B) SSP126 to 2060, (C) SSP585 to 2040 and (D) SSP585 to 2060.
